# Supplementary material for: Association of Heart Rate Variability With Cognitive Performance: The Multi‐Ethnic Study of Atherosclerosis
Source: PubMed Central journal article supplement — J Am Heart Assoc. 2020 Mar 21;9(7):e013827. doi: 10.1161/JAHA.119.013827 (PMC7428623; doi:10.1161/jaha.119.013827), 2020-03-21
Supplement: JAH3-9-e013827-s001.pdf [file JAH3-9-e013827-s001.pdf]

# **SUPPLEMENTAL MATERIAL**

**Table S1. Associations between heart rate variability and Exam 5 CASI scores from linear regression models after excluding participants taking beta blocker medication at Exam 1 (n = 247) or Exam 5 (n = 535).**

|              | CASI        |                   |                | Digit Symbol Coding |                   |                | Digit Span (total) |             |                |
|--------------|-------------|-------------------|----------------|---------------------|-------------------|----------------|--------------------|-------------|----------------|
|              | $\beta$     | 95% CI            | <i>P</i> value | $\beta$             | 95% CI            | <i>P</i> value | $\beta$            | 95% CI      | <i>P</i> value |
| <b>SDNN</b>  |             |                   |                |                     |                   |                |                    |             |                |
| Exam 1       | <b>0.36</b> | <b>0.05, 0.68</b> | <b>0.025</b>   | <b>0.94</b>         | <b>0.28, 1.60</b> | <b>0.005</b>   | 0.11               | -0.07, 0.30 | 0.237          |
| Exam 5       | <b>0.34</b> | <b>0.04, 0.65</b> | <b>0.029</b>   | <b>0.71</b>         | <b>0.07, 1.34</b> | <b>0.030</b>   | 0.15               | -0.03, 0.32 | 0.107          |
| Change       | -0.01       | -0.27, 0.24       | 0.920          | -0.27               | -0.80, 0.27       | 0.328          | 0.10               | -0.05, 0.25 | 0.178          |
| <b>RMSSD</b> |             |                   |                |                     |                   |                |                    |             |                |
| Exam 1       | 0.18        | -0.11, 0.47       | 0.219          | <b>0.61</b>         | <b>0.00, 1.12</b> | <b>0.049</b>   | 0.09               | -0.08, 0.26 | 0.294          |
| Exam 5       | 0.23        | -0.06, 0.52       | 0.114          | <b>0.64</b>         | <b>0.04, 1.23</b> | <b>0.037</b>   | 0.07               | -0.10, 0.24 | 0.413          |
| Change       | 0.03        | -0.23, 0.29       | 0.830          | -0.15               | -0.70, 0.40       | 0.591          | 0.12               | -0.03, 0.27 | 0.125          |

$\beta$  represents regression coefficients for log<sub>2</sub>-transformed HRV values adjusted for age, race/ethnicity, sex, education level, systolic blood pressure, CESD score, smoking status, body mass index, physical activity, antihypertensive and antiarrhythmic medication use, diabetes, *APOE* genotype, and incident myocardial infarction, heart failure, and stroke/TIA.

CASI: Cognitive Abilities Screening Instrument; CESD: Center for Epidemiological Studies Depression scale;

CI: confidence interval; RMSSD: root mean square of successive differences; SDNN: standard deviation of normal-normal intervals; TIA: transient ischemic attack.

**Table S2. Associations between heart rate variability and Exam 5 cognitive test scores from linear regression models adjusted for Model 2 covariates and RHR.**

|              | CASI    |             |                | Digit Symbol Coding |             |                | Digit Span (total) |             |                |
|--------------|---------|-------------|----------------|---------------------|-------------|----------------|--------------------|-------------|----------------|
|              | $\beta$ | 95% CI      | <i>P</i> value | $\beta$             | 95% CI      | <i>P</i> value | $\beta$            | 95% CI      | <i>P</i> value |
| <b>SDNN</b>  |         |             |                |                     |             |                |                    |             |                |
| Exam 1       | 0.29    | -0.04, 0.61 | 0.085          | 0.44                | -0.23, 1.12 | 0.199          | 0.05               | -0.13, 0.24 | 0.582          |
| Exam 5       | 0.16    | -0.14, 0.45 | 0.298          | 0.22                | -0.39, 0.83 | 0.478          | 0.16               | -0.01, 0.33 | 0.066          |
| Change       | -0.02   | -0.27, 0.23 | 0.864          | -0.17               | -0.68, 0.34 | 0.518          | 0.09               | -0.05, 0.23 | 0.214          |
| <b>RMSSD</b> |         |             |                |                     |             |                |                    |             |                |
| Exam 1       | 0.07    | -0.25, 0.39 | 0.667          | -0.04               | -0.70, 0.62 | 0.898          | 0.02               | -0.17, 0.20 | 0.854          |
| Exam 5       | -0.02   | -0.31, 0.27 | 0.869          | 0.01                | -0.59, 0.61 | 0.982          | 0.08               | -0.09, 0.25 | 0.321          |
| Change       | 0.00    | -0.25, 0.25 | 0.982          | -0.04               | -0.56, 0.48 | 0.875          | 0.11               | -0.03, 0.25 | 0.135          |

$\beta$  represents regression coefficients for log<sub>2</sub>-transformed HRV values adjusted for age, race/ethnicity, sex, education level, RHR, systolic blood pressure, CESD score, smoking status, body mass index, physical activity, antihypertensive and antiarrhythmic medication use, diabetes, *APOE* genotype, and incident myocardial infarction, heart failure, and stroke/TIA.

CASI: Cognitive Abilities Screening Instrument; CESD: Center for Epidemiological Studies Depression scale; CI: confidence interval; RHR: resting heart rate; RMSSD: root mean square of successive differences; SDNN: standard deviation of normal-normal intervals; TIA: transient ischemic attack.

**Table S3. Associations between RHR and Exam 5 cognitive test scores from linear regression models.**

|        | CASI         |                     |                  | Digit Symbol Coding |                     |                  | Digit Span (total) |             |                |
|--------|--------------|---------------------|------------------|---------------------|---------------------|------------------|--------------------|-------------|----------------|
|        | $\beta$      | 95% CI              | <i>P</i> value   | $\beta$             | 95% CI              | <i>P</i> value   | $\beta$            | 95% CI      | <i>P</i> value |
| Exam 1 | <b>-0.29</b> | <b>-0.55, -0.03</b> | <b>0.029</b>     | <b>-1.01</b>        | <b>-1.55, -0.47</b> | <b>&lt;0.001</b> | -0.13              | -0.28, 0.02 | 0.100          |
| Exam 5 | <b>-0.48</b> | <b>-0.75, -0.21</b> | <b>&lt;0.001</b> | <b>-1.22</b>        | <b>-1.78, -0.66</b> | <b>&lt;0.001</b> | -0.09              | -0.26, 0.07 | 0.256          |
| Change | -0.25        | -0.51, 0.02         | 0.074            | -0.30               | -0.86, 0.26         | 0.290            | 0.03               | -0.13, 0.18 | 0.733          |

$\beta$  represents regression coefficients for standardized RHR values adjusted for age, race/ethnicity, sex, education level, systolic blood pressure, CESD score, smoking status, body mass index, physical activity, antihypertensive and antiarrhythmic medication use, diabetes, *APOE* genotype, and incident myocardial infarction, heart failure, and stroke/TIA.

CESD: Center for Epidemiological Studies Depression scale; CI: confidence interval; RHR: resting heart rate;

RMSSD: root mean square of successive differences; SDNN: standard deviation of normal-normal intervals;

TIA: transient ischemic attack.

**Table S4. Associations between heart rate variability and Exam 5 CASI scores from linear regression models after multiple imputation (N = 6,814).**

|              | CASI        |                   |                | Digit Symbol Coding |                   |                | Digit Span (total) |             |                |
|--------------|-------------|-------------------|----------------|---------------------|-------------------|----------------|--------------------|-------------|----------------|
|              | $\beta$     | 95% CI            | <i>P</i> value | $\beta$             | 95% CI            | <i>P</i> value | $\beta$            | 95% CI      | <i>P</i> value |
| <b>SDNN</b>  |             |                   |                |                     |                   |                |                    |             |                |
| Exam 1       | 0.35        | -0.00, 0.70       | 0.051          | <b>0.62</b>         | <b>0.14, 1.11</b> | <b>0.012</b>   | 0.08               | -0.06, 0.23 | 0.268          |
| Exam 5       | <b>0.43</b> | <b>0.08, 0.78</b> | <b>0.016</b>   | <b>0.79</b>         | <b>0.21, 1.37</b> | <b>0.009</b>   | 0.14               | -0.02, 0.29 | 0.084          |
| Change       | 0.10        | -0.19, 0.39       | 0.505          | 0.02                | -0.47, 0.50       | 0.942          | 0.04               | -0.07, 0.16 | 0.442          |
| <b>RMSSD</b> |             |                   |                |                     |                   |                |                    |             |                |
| Exam 1       | 0.23        | -0.08, 0.54       | 0.144          | 0.30                | -0.14, 0.74       | 0.185          | 0.06               | -0.07, 0.20 | 0.351          |
| Exam 5       | <b>0.34</b> | <b>0.02, 0.65</b> | <b>0.038</b>   | <b>0.67</b>         | <b>0.15, 1.19</b> | <b>0.012</b>   | 0.10               | -0.03, 0.23 | 0.134          |
| Change       | 0.09        | -0.18, 0.37       | 0.504          | 0.11                | -0.35, 0.57       | 0.641          | 0.06               | -0.05, 0.16 | 0.288          |

$\beta$  represents regression coefficients for log<sub>2</sub>-transformed HRV values adjusted for age, race/ethnicity, sex, education level, systolic blood pressure, CESD score, smoking status, body mass index, physical activity, antihypertensive and antiarrhythmic medication use, diabetes, *APOE* genotype, and incident myocardial infarction, heart failure, and stroke/TIA.

CASI: Cognitive Abilities Screening Instrument; CESD: Center for Epidemiological Studies Depression scale;

CI: confidence interval; RMSSD: root mean square of successive differences; SDNN: standard deviation of normal-normal intervals; TIA: transient ischemic attack.
